# Silkworm spinning: the programmed self-assembly from natural silk fibroin to superfibre

Kai Song<sup>1,2</sup>, Yejing Wang<sup>1</sup>, Wenjie Dong<sup>2</sup>, Zhenzhen Li<sup>1</sup>, Huawei He<sup>1,3,4\*</sup>, Ping Zhu<sup>2,5\*</sup>, Qingyou Xia<sup>1,3\*</sup>

<sup>1</sup> State Key Laboratory of Silkworm Genome Biology, Biological Science Research Center, Southwest University, Beibei, Chongqing, 400715, China

<sup>2</sup> National Laboratory of Biomacromolecules, CAS Center for Excellence in Biomacromolecules, Institute of Biophysics, Chinese Academy of Sciences, Beijing 100101, China

<sup>3</sup> Chongqing Key Laboratory of Sericultural Science, Chongqing Engineering and Technology Research Center for Novel Silk Materials, Chongqing 400715, China

<sup>4</sup> Chongqing Key Laboratory of Soft-Matter Material Chemistry and Function Manufacturing, Chongqing 400715, China

<sup>5</sup> University of Chinese Academy of Sciences, Beijing, 100049, China

\*Correspondence to: Huawei He (hehuawei@swu.edu.cn), Ping Zhu (zhup@ibp.ac.cn) & Qingyou Xia (xiaqy@swu.edu.cn)

**Abstract:** Silkworm silk is one of the best natural protein fibers spun by the silkworm at ambient temperature and pressure using aqueous silk protein solution. It is a great challenge to reproduce high-performance artificial fibers comparable to natural silk by bionics for the incomplete understanding of silkworm spinning mechanism, especially the structure and assembly of natural silk fibroin (NSF) in the silk gland. Here, we studied the structure and assembly of NSF with the assistance of amphipol and digitonin. Our results showed NSFs were present as nanofibrils primarily composed of random coils in the silk gland. Metal ions were vital for the formation of NSF nanofibrils. The successive decrease in pH from posterior silk gland (PSG) to anterior silk gland (ASG) resulted in a gradual increase in NSF hydrophobicity. NSF nanofibrils were randomly arranged from PSG to ASG-1, and then self-assembled into herringbone-like patterns near the spinneret (ASG-2) ready for silkworm spinning. Our study reveals the mechanism by which silkworms cleverly utilize metal ions and pH gradient in the silk gland to drive the programmed self-assembly of NSF from disordered nanofibrils to anisotropic liquid crystalline spinning dope (herringbone-like patterns) for silkworm spinning, thus providing novel insights into silkworm/spider spinning mechanism and bionic creation of high-performance fibers.

## Main text

Silkworm silk is one of the best protein fibers in nature by far, which has been utilized by humans for more than 5,000 years as a traditional raw material of textiles. More than 100,000 tons of silk are produced in the world each year (1). Sericulture is the main source of family income for millions of farmers in Asia. Today, silk has shown great potentials in flexible electronics, biomedicine and other fields as a new type of material (2-6). In addition to silkworm silk, spider dragline silk has also attracted increasing interest, as its comprehensive properties are superior to those of any known synthetic fiber (2, 7, 8). However, the commercial era of spider silk has not yet come as spiders are difficult to be domesticated.

It is of great significance to resolve silkworm/spider spinning mechanism for bionics. To date, two models, liquid crystalline spinning (9) and micelle models (10), have been proposed. The

42 major difference lies in the understanding of silk protein (natural silk fibroin, NSF) structure and  
43 assembly *in vivo*. The former suggests that silk protein forms liquid crystalline (11-13), while the  
44 latter claims that silk protein is present as micelles for its amphiphilic primary sequence (10, 14,  
45 15). NSF is stable at 15-30% (w/v) concentrations without precipitation *in vivo* (2, 16, 17),  
46 whereas it readily transforms from random coil to  $\beta$ -sheet structure *in vitro*, resulting in protein  
47 precipitation (18). NSF also forms a left-handed 3/2 helix structure specifically at the air-water  
48 interface (19). Although sericin may protect regenerated silk fibroin (RSF) from aggregation (20),  
49 it remains unclear how to keep NSF stable *in vitro*. Thus, studying the structure and assembly of  
50 NSF *in vivo* is extremely challenging.

51 Here, we found amphipol and digitonin could keep NSF stable *in vitro* through large-scale  
52 screening, and then studied the structure and assembly of NSF *in vivo* using metal shadowing,  
53 analytical ultracentrifugation (AUC), fluorescence and circular dichroism (CD) spectroscopy.  
54 Our results showed from posterior silk gland (PSG) to anterior silk gland (ASG), NSFs were  
55 present as nanofibrils predominantly composed of random coils. Metal ions were crucial for the  
56 formation of NSF nanofibrils. NSF nanofibrils were randomly distributed in the lumen from PSG  
57 to ASG-1. The hydrophobicity of NSF gradually increased with the decrease of pH from PSG to  
58 ASG. Near the spinneret, NSFs self-assembled to form herringbone-like patterns (anisotropic  
59 liquid crystalline) ready for silkworm spinning.

#### 60 **Digitonin/amphipol could stabilize NSF *in vitro***

61 Large-scale screening showed that membrane scaffold protein MSP1D1 could improve NSF  
62 stability from 144 h to 240 h *in vitro* in a concentration-dependent manner. In contrast, BSA  
63 decreased NSF stability from 144 h to 96 h (Fig. 1A). MSP1D1 is known as a genetically  
64 engineered protein mimicking apolipoprotein A-1 (APOA-1) for the structural study of  
65 membrane proteins (21). Both APOA and APOE belong to the apolipoprotein family. APOE  
66 regulates amyloid- $\beta$  plaques in the brain of Alzheimer's patients (22). Inspired by the  
67 amphiphilicity of MSP1D1, we found amphipol and digitonin were similar to MSP1D1, which  
68 could keep NSF stable for 336 h without precipitation (Fig. 1B). Digitonin did not change the  
69 secondary structure of NSF (Fig. 1C). Indeed, it stabilized the secondary structure of NSF (Fig.  
70 1D) without altering its state (Fig. 1E). In contrast, NSF transformed rapidly from random coil to  
71  $\beta$ -sheet structure in the absence of digitonin *in vitro* (Fig. 1F), leading to protein precipitation  
72 (Fig. 1G). Amphipol was not suitable in CD study for high background noise, although it could  
73 also stabilize NSF *in vitro*.

#### 74 **NSFs are present as nanofibrils composed of random coils in the silk gland**

75 With the aid of amphipol/digitonin, we studied the components and properties of NSF. Blue  
76 native polyacrylamide gel electrophoresis (BN-PAGE, 3-16%) and SDS-PAGE (4-16%) showed  
77 NSF was a macromolecular complex containing four subunits (Fig. 2A), which were further  
78 identified as fibroin heavy chain (Fib-H), fibroin light chain (Fib-L), P25 and P25-like by mass  
79 spectrometry, respectively (Extended Data Fig. 1).

80 CD spectra suggested the secondary structure of NSF consisted mainly of random coils and a  
81 small number of  $\alpha$ -helices from PSG to ASG (Fig. 2B), where NSF from ASG was purified by  
82 ions exchange and size exclusion chromatography (Extended Data Fig. 2). RSF was also mainly  
83 composed of random coils (Extended Data Fig. 3), which did not change over time under  
84 different pH (Extended Data Fig. 4). However, the negative cotton effect of RSF completely  
85 disappeared at 222 nm (Extended Data Fig. 3), indicating the difference between NSF and RSF.

86 AUC showed that the sedimentation coefficients of NSF from PSG, posterior of MSG  
87 (PMSG), middle of MSG (MMSG) and anterior of MSG (AMSG) were 5.788 S, 5.766 S, 5.798  
88 S and 5.862 S, and the corresponding friction ratios were 4.088, 4.145, 3.982 and 4.056 (Fig. 2C),  
89 respectively. Friction ratios indicated that NSF has a large axial (length-to-width) ratio, implying  
90 it may be a fibrous protein. The sedimentation coefficients were very close, indicating NSFs are  
91 almost identical from PSG to AMSG.

92 Metal shadowing showed that NSFs were present as nanofibrils without morphological  
93 differences from PSG to ASG (Fig. 2D), which was in line with AUC analysis. Cryogenic  
94 transmission electron microscopy (Cryo-TEM) further confirmed the formation of NSF  
95 nanofibrils (Extended Data Fig. 5).

### 96 **Metal ions induce the formation of NSF nanofibrils**

97 NSF is regarded as a rod-like structure formed by non-covalent aggregation of globular fibroin  
98 protein (23-25). However, even after incubation with 8 M urea, 2% Triton X-100 and 15 mM  
99 dithiothreitol (DTT) for 18 h at 25°C, NSFs were still present as nanofibrils without the  
100 appearance of globules (Extended Data Fig. 6, A and B), suggesting NSF are not aggregates of  
101 globular protein.

102 Metal shadowing showed that NSF itself did not form nanofibrils in water, while formed  
103 nanofibrils in 50 mM NaCl, which disappeared again after dialysis (Fig. 3A). Hence, we  
104 investigated the effects of metal ions on NSF nanofibrils. At 1 mM, Na<sup>+</sup> and K<sup>+</sup> induced NSF to  
105 form immature fibrous-like structure (Fig. 3B, a and b), while Ca<sup>2+</sup> and Mg<sup>2+</sup> induced NSF to  
106 assemble into nanofibrils (Fig. 3B, c and d). At 2.5 mM, Na<sup>+</sup> and K<sup>+</sup> further induced NSF to  
107 assemble into nanofibrils (Fig. 3B, e and f). Once the nanofibrils were formed, they did not  
108 change with increasing metal ions concentration, even the concentration increased up to 300 mM  
109 (Fig. 3B, g to p).

110 Dynamic light scattering (DLS) showed that the hydrodynamic radius and polydispersion  
111 coefficient of NSF were 21 nm and 20.5% in 50 mM NaCl, respectively. After dialysis with  
112 water, the hydrodynamic radius slightly decreased to 18.4 nm, and the polydispersion coefficient  
113 was multimodal (Extended Data Fig. 6C). No spherical NSF particles with uniform size and  
114 smaller hydrodynamic radius appeared after dialysis, suggesting that NSF nanofibrils are not  
115 assembled by the aggregation of globular fibroin molecules. The results suggested metal ions are  
116 necessary for the formation of NSF nanofibrils. The assembly of NSF nanofibrils induced by  
117 metal ions is similar to that of chromatin (26).

### 118 **The decrease of pH improves NSF hydrophobicity**

119 It is known that the pH in the lumen of silk gland of both silkworms (27) and spiders (28, 29)  
120 continuously decreases from PSG to ASG, which could be mimicked by continuously decreasing  
121 pH from 8.0 to 4.8 within 12 h *in vitro* (Fig. 4A). CD spectra showed that pH decreasing did not  
122 change the random coil structure of NSF (Fig. 4B), which was consistent with the random coil  
123 structure of NSF observed from different segments of the silk gland (Fig. 2B).

124 ANS fluorescence spectra showed that pH decreasing induced a gradual blue-shift of the  
125 maximum emission peak ( $\lambda_{\max}$ , 507 nm) of NSF (Fig. 4C), indicating a gradual exposure of  
126 NSF hydrophobic residues and an increase of NSF hydrophobicity. Similarly, the  $\lambda_{\max}$  of RSF  
127 gradually blue-shifted with the decrease of pH (Extended Data Fig. 7), indicating pH decreasing  
128 improves RSF hydrophobicity, which was in line with the effect of pH on NSF.

129 The random coil structure of NSF was stable in pH 4.8-5.6 within 160 h, however, it gradually  
130 transformed into  $\beta$ -sheet structure in pH 6.0-8.0. Increasing pH promoted the transition of  
131 random coil to  $\beta$ -sheet structure of NSF (Fig. 4D). The results suggested that the decrease of pH  
132 from PSG to ASG does not change the random coil structure of NSF, but results in the exposure  
133 of the hydrophobic residues, thus improving the hydrophobicity of NSF.

### 134 **NSFs self-assemble into herringbone-like patterns near the spinneret**

135 It is not yet clear where the liquid crystalline of silk protein is formed in the current liquid  
136 crystalline model (9, 11, 30, 31). To address this problem, the orientation of NSF was observed  
137 in solution and *in situ* in the spinning dope by metal shadowing, respectively (Extended Data Fig.  
138 8). The results showed NSFs were present as nanofibrils randomly arranged in solution. While  
139 the concentration was higher than  $0.15 \text{ mg}\cdot\text{mL}^{-1}$ , NSF nanofibrils were tightly stacked with  
140 random arrangement, and did not change with the increase of NSF concentration (Fig. 5A, a to d).

141 From PSG to ASG-1 (Fig. 5B), most of NSF nanofibrils were tightly stacked with isotropic  
142 orientation (Fig. 5C, a to d), which was consistent with the orientation of NSF nanofibrils in  
143 solution (Fig. 5A, c and d). However, a small number of NSF nanofibrils formed an ordered  
144 arrangement (Extended Data Fig. 9), which is consistent with the observation of Inoue *et al* (32).  
145 Interestingly, the long-range ordered molecular alignment of NSF nanofibrils was not observed  
146 in the ultra-thin section of ASG-1 (Extended Data Fig. 10), but near the spinneret of ASG-2,  
147 where NSF nanofibrils self-assembled into herringbone-like patterns, with the long axes of  
148 adjacent molecules aligned parallel to each other (Fig. 5D). The herringbone-like patterns were  
149 further packed together to form the spinning dope (Fig. 5E). The results indicated that NSFs are  
150 randomly arranged in the lumen from PSG to ASG-1 as isotropic nanofibrils, and self-assemble  
151 to form herringbone-like patterns at ASG-2 parallel to the flow direction, which are further  
152 packed to form the liquid-crystalline spinning dope with obvious birefringence (30).

### 153 **Discussion**

154 Understanding the structure and assembly of NSF in the silk gland is vital to reveal silkworm  
155 natural spinning mechanism. However, it is a great challenge to study the structure and assembly  
156 of NSF as it is prone to aggregation *in vitro*. Although RSF is fairly stable *in vitro* (33), it has  
157 different rheological behaviors (34, 35) and structural properties from NSF (Fig. 4, B and D and  
158 Extended Data Fig. 3 and 4). Thus, RSF is not an ideal alternative to NSF.

159 To better study the structure and assembly of NSF, we screened and found digitonin and  
160 amphipol could stabilize NSF structure *in vitro* (Fig. 1). Digitonin and amphipol likely interact  
161 with NSF through hydrophobic interactions, thus preventing NSF aggregation by shielding the  
162 hydrophobic regions of NSF. Although it remains unclear how spiders and silkworms keep high  
163 concentrations of silk protein stable *in vivo* (16, 18, 36), our results establish a fundamental basis  
164 for studying the structure and assembly of NSF.

165 The current silk spinning models have shown different understanding on the assembly of silk  
166 protein. The micelle model suggests NSFs form micelles (100-200 nm) in solution. With the  
167 increase of NSF concentration, micelles coalesce into larger globules (0.8-15  $\mu\text{m}$ ), which are  
168 further aligned to form fibers under the action of shearing force (10, 16, 39). However, the liquid  
169 crystalline model indicates the spinning dope in the spider gland and duct forms a nematic phase  
170 consisting of rod-like structures, which are essentially aggregates of spherical silk protein (9, 23).

171 Previous evidences show NSF is a large molecular complex (2.3 MDa) composed of Fib-H,  
172 Fib-L and P25 as a molar ratio of 6:6:1 (37) with a sedimentation coefficient of 10 s (38). Here,  
173 we identified a new component P25-like in NSF, and demonstrated that NSFs are present as  
174 nanofibrils with a sedimentation coefficient of about 5.8 S and a friction ratio of about 4.0 both  
175 *in vitro* (Fig. 2, C and D and Extended Data Fig. 3) and *in vivo* (Fig. 5C, a to d). Metal ions are  
176 essential for the formation of NSF nanofibrils (Fig. 3A).

177 Vollrath *et al.* propose the liquid crystalline spinning model (9) based on the birefringence of  
178 the spinning dope of spiders (13) and silkworms (11). However, it is not clear whether the liquid  
179 crystalline phase is inherent in the silk gland (9, 11), or caused by the shearing force during  
180 silkworm spinning (30). Kerkam *et al.* indicate that liquid crystals are formed after silk protein  
181 out of the silk gland but prior to the formation of silk fiber (31). Inspired by the discovery of  
182 graphene (40), we peeled NSF carefully from the spinning dope without altering its orientation,  
183 and then determined the molecular orientation of NSF nanofibrils *in situ* in the spinning dope.  
184 Metal shadowing showed that NSF nanofibrils are randomly arranged with isotropic orientation  
185 from PSG to ASG-1 (Fig. 5C, a to d). Interestingly, NSF nanofibrils self-assemble into  
186 herringbone-like patterns with long-range ordered alignment and anisotropic orientation at ASG-  
187 2 (Fig. 5, D and E), where silk proteins show obvious birefringence (30), indicating NSF  
188 nanofibrils form anisotropic liquid crystalline phase in the spinning dope at ASG-2. Our results  
189 not only provide direct evidence for the presence of liquid crystalline phase *in vivo*, but also  
190 clearly indicate the composition and location of liquid crystalline phase.

191 The liquid crystalline model suggests NSF forms supramolecular rod-like structures assembled  
192 by aggregation of globular silk protein (23), however, NSF nanofibrils are very stable without  
193 depolymerization into globules even treated by 8 M urea, 2% Triton X-100 and 15 mM DTT at  
194 25°C for 18 h (Extended Data Fig. 6, A and B). DLS indicated NSF nanofibrils may disassemble  
195 to form intertwined peptide chains after dialysis with water, rather than globules (Extended Data  
196 Fig. 6C).

197 Our results strongly support that NSFs form nanofibrils instead of the assembly of globules in  
198 the silk gland, which are different from the micelles/globules in the micelles model (10, 16, 39)  
199 and the supramolecular rod-like aggregates of globular silk protein in the liquid crystalline model  
200 (23). In line with the nanofibrils previously observed in silk fibers (41-43), our results provided  
201 direct evidence that silk fibers are assembled from nanofibrils.

202 Although acidification induces the transformation of spider silk protein from random coil to  $\beta$ -  
203 sheet structure (29, 44), our study suggested that NSFs from different segments of the silk gland  
204 are mainly composed of random coil (Fig. 2B), and pH decreasing does not change the random  
205 coil structure of NSF (Fig. 4B), indicating acidification (pH decreasing) does not induce the  
206 formation of  $\beta$ -sheet structure of NSF *in vivo*. Surprisingly, the  $\beta$ -sheet crystallinity of silk fiber  
207 is very small produced by silkworms at low humidity (45), implying that NSF itself does not  
208 form  $\beta$ -sheet structure *in vivo*. Therefore, the  $\beta$ -sheet structure of silk fiber is most likely formed  
209 after NSF is spun out of the silk gland.

210 Dehydration caused by shearing force and extensional flow is crucial for silk formation (9, 30),  
211 as sufficiently high concentration of NSF is the basis for silkworms spinning. Here, we found  
212 that pH decreasing improves the hydrophobicity of NSF instead of inducing the formation of  $\beta$ -  
213 sheet structure (Fig. 4C), which further triggers the separation of NSF from water, thus  
214 promoting the dehydration of NSF and an increase of NSF concentration (9). Our study suggests

215 that the dehydration caused by pH decreasing is likely crucial for the self-assembly of NSF  
216 nanofibrils into herringbone-like patterns (anisotropic liquid crystalline phase) and the final  
217 formation of silk fiber.

218 Obviously, good molecular pre-alignment contributes significantly to the toughness of silk  
219 fiber (9). Unlike the alignment formed by post-spinning stretching in current artificial spinning,  
220 this pre-formed highly ordered molecular alignment may explain the higher toughness of natural  
221 silk compared to artificial silk (46), and is likely the basis of spider silk as biological superlens  
222 (47). Unfortunately, it is still unclear how NSF nanofibrils self-assemble into herringbone-like  
223 patterns, which is likely initiated by the dimerization of the N-terminal domain of silk protein in  
224 response to pH decreasing (48-50), and related to NSF concentration (11, 31) and shearing force  
225 (30).

226 In summary, our results suggest NSFs are present as nanofibrils mainly composed of random  
227 coils in the silk gland. Metal ions are indispensable for the formation of NSF nanofibrils. The  
228 successive pH decreasing from PSG to ASG improves the hydrophobicity and concentration of  
229 NSF rather than inducing the formation of  $\beta$ -sheet structure of NSF. NSF nanofibrils are  
230 randomly arranged from PSG to ASG-1, and self-assemble into anisotropic liquid crystalline  
231 spinning dope (herringbone-like patterns) at ASG-2 ready for silkworm spinning (Fig. 6).  
232 Consequently, silk fibers are formed by the programmed self-assembly of NSF nanofibers  
233 undergo an orientation transition from isotropy to anisotropy under the actions of various factors  
234 such as decreasing pH gradient, metal ions and shearing force. These findings provide novel  
235 insights into silkworm spinning mechanism and biomimetic synthesis of high-performance fibers.

## 236 **References and Notes:**

- 237 1. N. V. Padaki, B. Das, A. Basu, "[Advances in understanding the properties of silk]" in *Advances in silk science*  
238 *and technology* (Woodhead Publishing, UK, 2015), pp. 3-4.
- 239 2. F. G. Omenetto, D. L. Kaplan, New opportunities for an ancient material. *Science* **329**, 528-531 (2010).
- 240 3. D. H. Kim *et al.*, Dissolvable films of silk fibroin for ultrathin conformal bio-integrated electronics. *Nat. Mater.* **9**,  
241 511-517 (2010).
- 242 4. C. Guo *et al.*, Thermoplastic moulding of regenerated silk. *Nat. Mater.* **19**, 102-108 (2020).
- 243 5. W. Lee *et al.*, A rewritable optical storage medium of silk proteins using near-field nano-optics. *Nat. Nanotechnol.*  
244 **15**, 941-947 (2020).
- 245 6. U. Shimanovich *et al.*, Silk micrococoon for protein stabilisation and molecular encapsulation. *Nat. Commun.* **8**,  
246 15902 (2017).
- 247 7. C. Fu, Z. Shao, V. Fritz, Animal silks: their structures, properties and artificial production. *Chem. Commun.*  
248 (Cambridge, U. K.), 6515-6529 (2009).
- 249 8. I. Agnarsson, M. Kuntner, T. A. Blackledge, Bioprospecting Finds the Toughest Biological Material:  
250 Extraordinary Silk from a Giant Riverine Orb Spider. *PLoS One* **5**, (2010).
- 251 9. F. Vollrath, D. P. Knight, Liquid crystalline spinning of spider silk. *Nature* **410**, 541-548 (2001).
- 252 10. H. J. Jin, D. L. Kaplan, Mechanism of silk processing in insects and spiders. *Nature* **424**, 1057-1061 (2003).
- 253 11. G. X. Li, T. Y. Yu, Investigation of the liquid-crystal state in silk fibroin. *Makromol. Chem., Rapid Commun.* **10**,  
254 387-389 (1989).
- 255 12. P. J. Willcox, S. P. Gido, W. Muller, D. L. Kaplan, Evidence of a cholesteric liquid crystalline phase in natural  
256 silk spinning processes. *Macromolecules* **29**, 5106-5110 (1996).
- 257 13. D. P. Knight, F. Vollrath, Liquid crystals and flow elongation in a spider's silk production line. *Proc. R. Soc. B*

- 258        **266**, 519-523 (1999).
- 259    14. M. Heim, D. Keerl, T. Scheibel, Spider silk: From soluble protein to extraordinary fiber. *Angew. Chem., Int. Ed.*
- 260        **48**, 3584-3596 (2009).
- 261    15. R. Silvers, F. Buhr, H. Schwalbe, The molecular mechanism of spider-silk formation. *Angew. Chem., Int. Ed.* **49**,
- 262        5410-5412 (2010).
- 263    16. E. Atkins, Silk's secrets. *Nature* **424**, 1010 (2003).
- 264    17. F. Hagn *et al.*, A conserved spider silk domain acts as a molecular switch that controls fibre assembly. *Nature*
- 265        **465**, 239-242 (2010).
- 266    18. I. Greving, C. Dicko, A. Terry, P. Callow, F. Vollrath, Small angle neutron scattering of native and reconstituted
- 267        silk fibroin. *Soft Matter* **6**, 4389-4395 (2010).
- 268    19. R. Valluzzi, S. P. Gido, W. P. Zhang, W. S. Muller, D. L. Kaplan, Trigonal crystal structure of *Bombyx mori* silk
- 269        incorporating a threefold helical chain conformation found at the air-water interface. *Macromolecules* **29**, 8606-
- 270        8614 (1996).
- 271    20. H. W. Kwak, J. E. Ju, M. Shin, C. Holland, K. H. Lee, Sericin promotes fibroin silk I stabilization across a
- 272        phase-separation. *Biomacromolecules* **18**, 2343-2349 (2017).
- 273    21. I. G. Denisov, S. G. Sligar, Nanodiscs for structural and functional studies of membrane proteins. *Nat. Struct.*
- 274        *Mol. Biol.* **23**, 481-486 (2016).
- 275    22. Y. Yamazaki, N. Zhao, T. R. Caulfield, C. C. Liu, G. J. Bu, Apolipoprotein E and Alzheimer disease:
- 276        pathobiology and targeting strategies. *Nat. Rev. Neurol.* **15**, 501-518 (2019).
- 277    23. C. Viney, Natural silks : Archetypal supramolecular assembly of polymer fibres. *Supramol. Sci.* **4**, 75-81 (1997).
- 278    24. T. Y. Lin *et al.*, Liquid crystalline granules align in a hierarchical structure to produce spider dragline
- 279        microfibrils. *Biomacromolecules* **18**, 1350-1355 (2017).
- 280    25. S. Ling, C. Li, K. Jin, D. L. Kaplan, M. J. Buehler, Liquid exfoliated natural silk nanofibrils: Applications in
- 281        optical and electrical devices. *Adv. Mater. (Weinheim, Ger.)* **28**, 7783-7790 (2016).
- 282    26. S. A. Grigoryev, G. Arya, S. Correll, C. L. Woodcock, T. Schlick, Evidence for heteromorphic chromatin fibers
- 283        from analysis of nucleosome interactions. *Proc. Natl. Acad. Sci. U. S. A.* **106**, 13317-13322 (2009).
- 284    27. L. J. Domigan *et al.*, Carbonic anhydrase generates a pH gradient in *Bombyx mori* silk glands. *Insect Biochem.*
- 285        *Mol. Biol.* **65**, 100-106 (2015).
- 286    28. M. Andersson *et al.*, Carbonic anhydrase generates CO<sub>2</sub> and H<sup>+</sup> that drive spider silk formation via opposite
- 287        effects on the terminal domains. *PLoS Biol.* **12**, (2014).
- 288    29. C. Dicko, F. Vollrath, J. M. Kenney, Spider silk protein refolding is controlled by changing pH.
- 289        *Biomacromolecules* **5**, 704-710 (2004).
- 290    30. T. Asakura *et al.*, Some observations on the structure and function of the spinning apparatus in the silkworm
- 291        *Bombyx mori*. *Biomacromolecules* **8**, 175-181 (2007).
- 292    31. K. Kerkam, C. Viney, D. Kaplan, S. Lombardi, Liquid crystallinity of natural silk secretions. *Nature* **349**, 596-
- 293        598 (1991).
- 294    32. S. Inoue *et al.*, Nanostructure of natural fibrous protein: In vitro nanofabric formation of *Samia cynthia ricini*
- 295        wild silk fibroin by self-assembling. *Nano Lett.* **3**, 1329-1332 (2003).
- 296    33. D. N. Rockwood *et al.*, Materials fabrication from *Bombyx mori* silk fibroin. *Nat. Protoc.* **6**, 1612-1631 (2011).
- 297    34. D. Porter, F. Vollrath, Silk as a biomimetic ideal for structural polymers. *Adv. Mater. (Weinheim, Ger.)* **21**, 487-
- 298        492 (2009).
- 299    35. C. Holland, A. E. Terry, D. Porter, F. Vollrath, Comparing the rheology of native spider and silkworm spinning
- 300        dope. *Nat. Mater.* **5**, 870-874 (2006).
- 301    36. E. Pennisi, Untangling spider biology: Genomics begins to unravel the roots of spider diversity and the recipes

- 302 of their silk and venom. *Science* **358**, 288-291 (2017).
- 303 37. S. Inoue *et al.*, Silk fibroin of *Bombyx mori* is secreted, assembling a high molecular mass elementary unit  
304 consisting of H-chain, L-chain, and P25, with a 6:6:1 molar ratio. *J. Biol. Chem.* **275**, 40517-40528 (2000).
- 305 38. Y. Tashiro, E. Otsuki, Studies on posterior silk gland of silkworm *Bombix mori* IV. Ultracentrifugal analyses of  
306 native silk proteins, especially fibroin extracted from middle silk gland of mature silkworm. *J. Cell Biol.* **46**, 1-&  
307 (1970).
- 308 39. L. R. Parent *et al.*, Hierarchical spidroin micellar nanoparticles as the fundamental precursors of spider silks.  
309 *Proc. Natl. Acad. Sci. U. S. A.* **115**, 11507-11512 (2018).
- 310 40. K. S. Novoselov *et al.*, Electric field effect in atomically thin carbon films. *Science* **306**, 666-669 (2004).
- 311 41. N. Du, Z. Yang, X. Y. Liu, Y. Li, H. Y. Xu, Structural origin of the strain-hardening of spider silk. *Adv. Funct.*  
312 *Mater.* **21**, 772-778 (2011).
- 313 42. S. H. Choi *et al.*, Anderson light localization in biological nanostructures of native silk. *Nat. Commun.* **9**, 452  
314 (2018).
- 315 43. S. Putthananat, N. Stribeck, S. A. Fossey, R. K. Eby, W. W. Adams, Investigation of the nanofibrils of silk fibers.  
316 *Polymer* **41**, 7735-7747 (2000).
- 317 44. C. Dicko, J. M. Kenney, D. Knight, F. Vollrath, Transition to a  $\beta$ -sheet-rich structure in spidroin *in vitro*: The  
318 effects of pH and cations. *Biochemistry-Us* **43**, 14080-14087 (2004).
- 319 45. M. Boulet-Audet, C. Holland, T. Gheysens, F. Vollrath, Dry-spun silk produces native-like fibroin solutions.  
320 *Biomacromolecules* **17**, 3198-3204 (2016).
- 321 46. M. Andersson *et al.*, Biomimetic spinning of artificial spider silk from a chimeric minispidroin. *Nat. Chem. Biol.*  
322 **13**, 262-264 (2017).
- 323 47. J. N. Monks, B. Yan, N. Hawkins, F. Vollrath, Z. Wang, Spider silk: Mother nature's bio-superlens. *Nano Lett.*  
324 **16**, 5842-5845 (2016).
- 325 48. Y. X. He *et al.*, N-terminal domain of *Bombyx mori* fibroin mediates the assembly of silk in response to pH  
326 decrease. *J. Mol. Biol.* **418**, 197-207 (2012).
- 327 49. W. A. Gaines, M. G. Sehorn, W. R. Marcotte, Jr., Spidroin N-terminal domain promotes a pH-dependent  
328 association of silk proteins during self-assembly. *J. Biol. Chem.* **285**, 40745-40753 (2010).
- 329 50. G. Askarieh *et al.*, Self-assembly of spider silk proteins is controlled by a pH-sensitive relay. *Nature* **465**, 236-  
330 238 (2010).
- 331 51. Q. Xia, S. Li, Q. Feng, Advances in silkworm studies accelerated by the genome sequencing of *Bombyx mori*.  
332 *Annu. Rev. Entomol.* **59**, 513-536 (2014).
- 333 52. J. Y. Li *et al.*, Comparative proteomic analysis of the silkworm middle silk gland reveals the importance of  
334 ribosome biogenesis in silk protein production. *J. Proteomics* **126**, 109-120 (2015).
- 335 53. T. K. Ritchie *et al.*, Chapter 11 - Reconstitution of membrane proteins in phospholipid bilayer nanodiscs.  
336 *Methods Enzymol.* **464**, 211-231 (2009).
- 337 54. I. Wittig, H. P. Braun, H. Schagger, Blue native PAGE. *Nat. Protoc.* **1**, 418-428 (2006).
- 338 55. J. D. Griffith, Electron microscopic visualization of DNA in association with cellular components. *Methods Cell*  
339 *Biol.* **7**, 129-146 (1973).
- 340
- 341
- 342
- 343
- 344
- 345
- 346



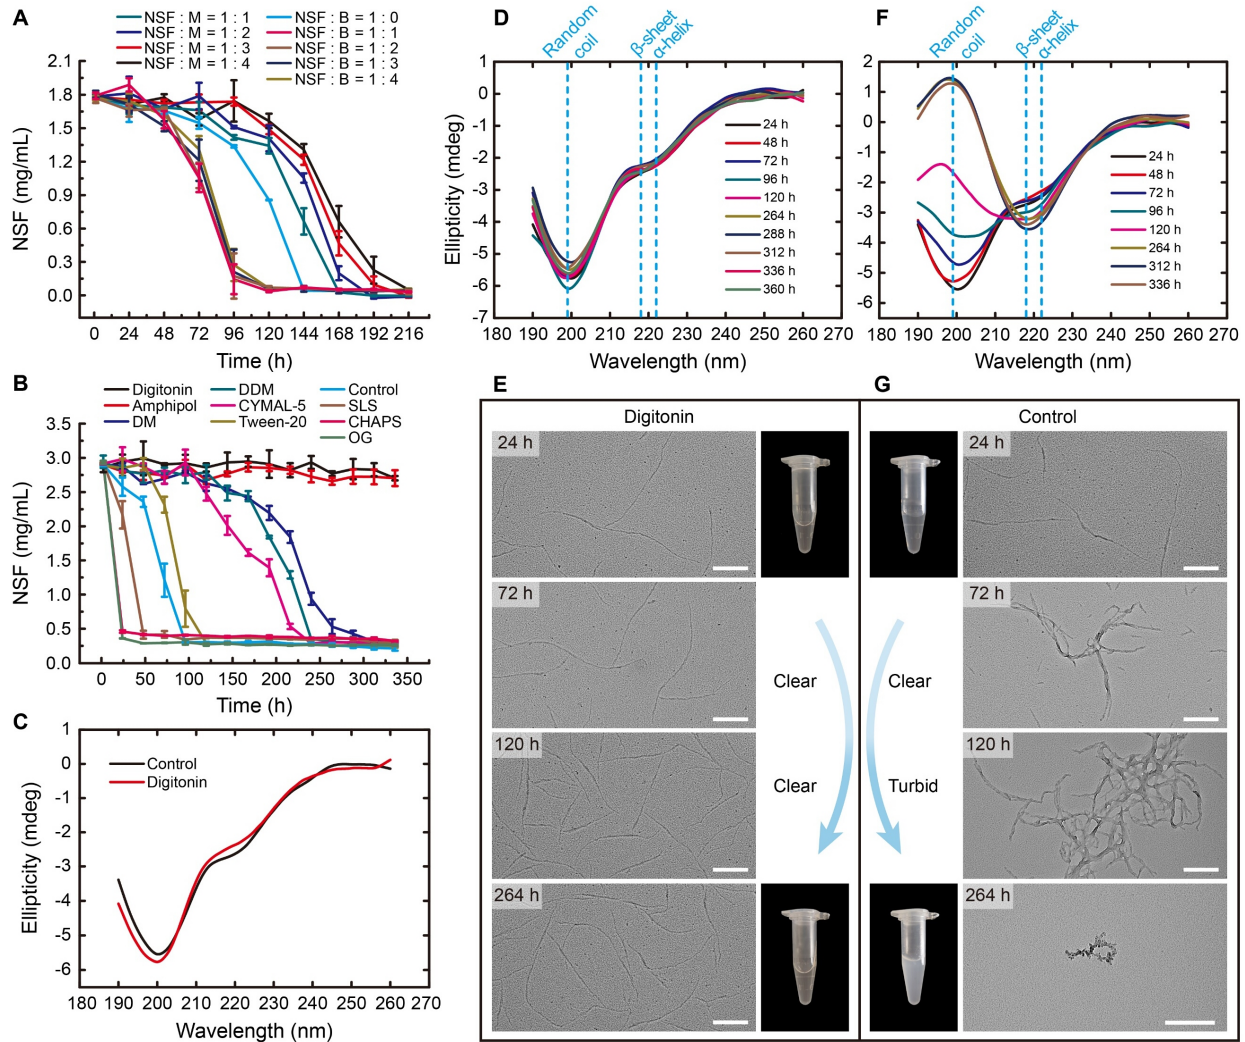

347

348 **Fig. 1. Amphiphilic molecules improved the stability of NSF *in vitro*.** (A) The changes of UV  
 349 absorption of NSF ( $A_{280}$ ) over time in the presence of MSP1D1. M, MSP1D1; B, BSA. (B) The  
 350 changes of UV absorption of NSF ( $A_{280}$ ) over time in the presence of different detergents. (C)  
 351 CD spectra of NSF in the presence or absence of digitonin. (D) CD spectra of NSF in the  
 352 presence of digitonin over time. (E) The morphology of NSF in the presence of digitonin. The  
 353 inset showed NSF was stable in the presence of digitonin after 24 h and 264 h, respectively. (F)  
 354 CD spectra of NSF in the absence of digitonin over time. (G) The morphology of NSF in the  
 355 absence of digitonin. The inset showed the aggregation of NSF in the absence of digitonin after  
 356 24 h and 264 h, respectively. Scale bar, 200 nm.

357

358

359

360

361

362

363

364

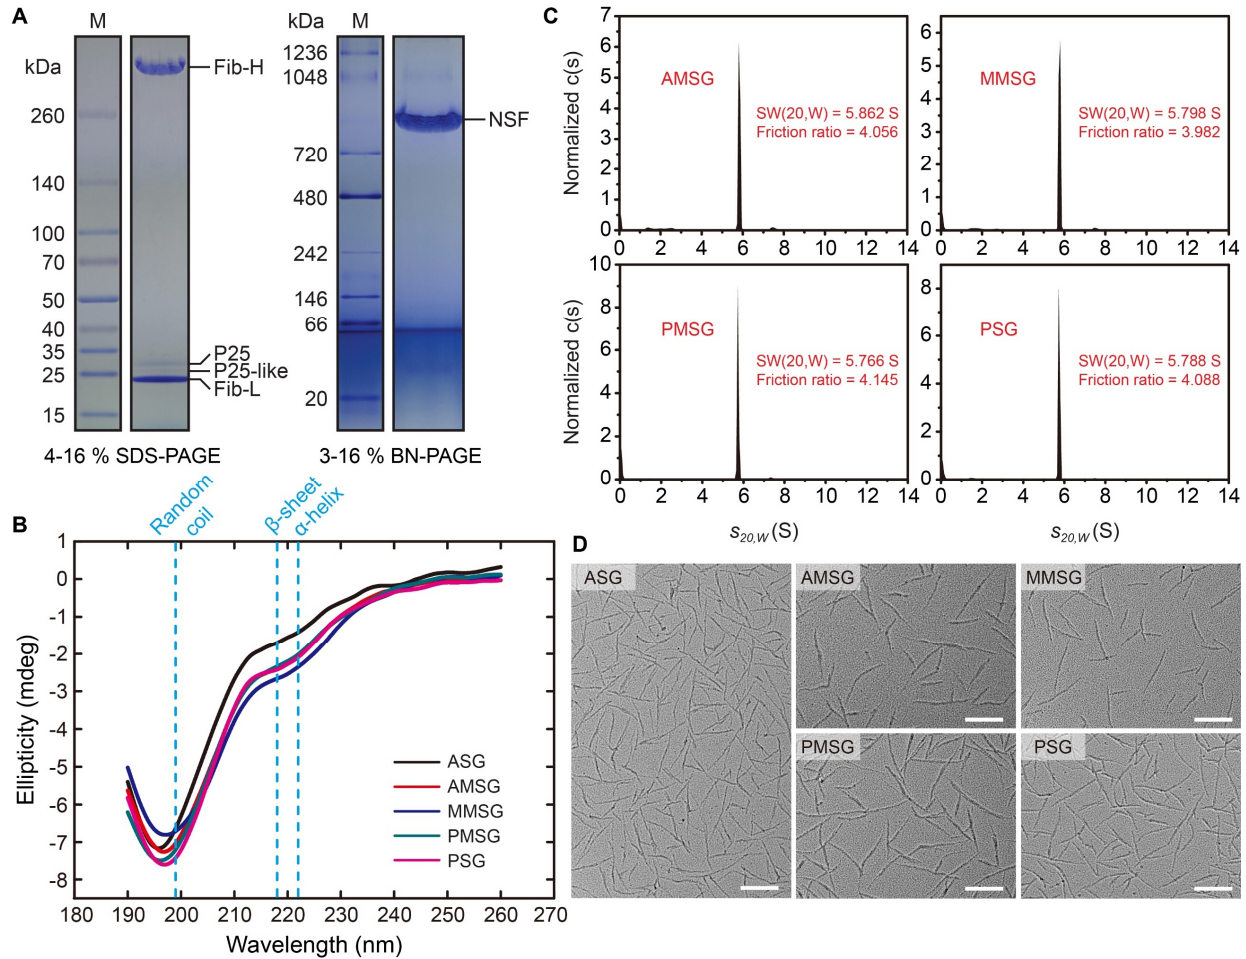

365

366 **Fig. 2. The components and structure of NSF.** (A) NSF components analysis. NSF was  
 367 separated by linear gradient SDS-PAGE gel (4-16%) (left) and BN-PAGE gel (3-16%) (right).  
 368 (B) CD spectra of NSF from PSG, PMSG, MMSG, AMMSG, ASG. (C) AUC analysis of NSF  
 369 from PSG, PMSG, MMSG and AMMSG. The distributions of normalized  $c(s)$  were plotted as the  
 370 function of the sedimentation coefficients  $s_{20,w}$  (S). S, Svedberg (the unit of sedimentation  
 371 coefficient). (D) Metal shadowing of NSF from PSG, PMSG, MMSG, AMMSG and ASG. NSF  
 372 concentration was  $0.025 \text{ mg} \cdot \text{mL}^{-1}$  in 10 mM phosphate buffer. Scale bar, 200 nm.

373

374

375

376

377

378

379

380

381

382

383

384

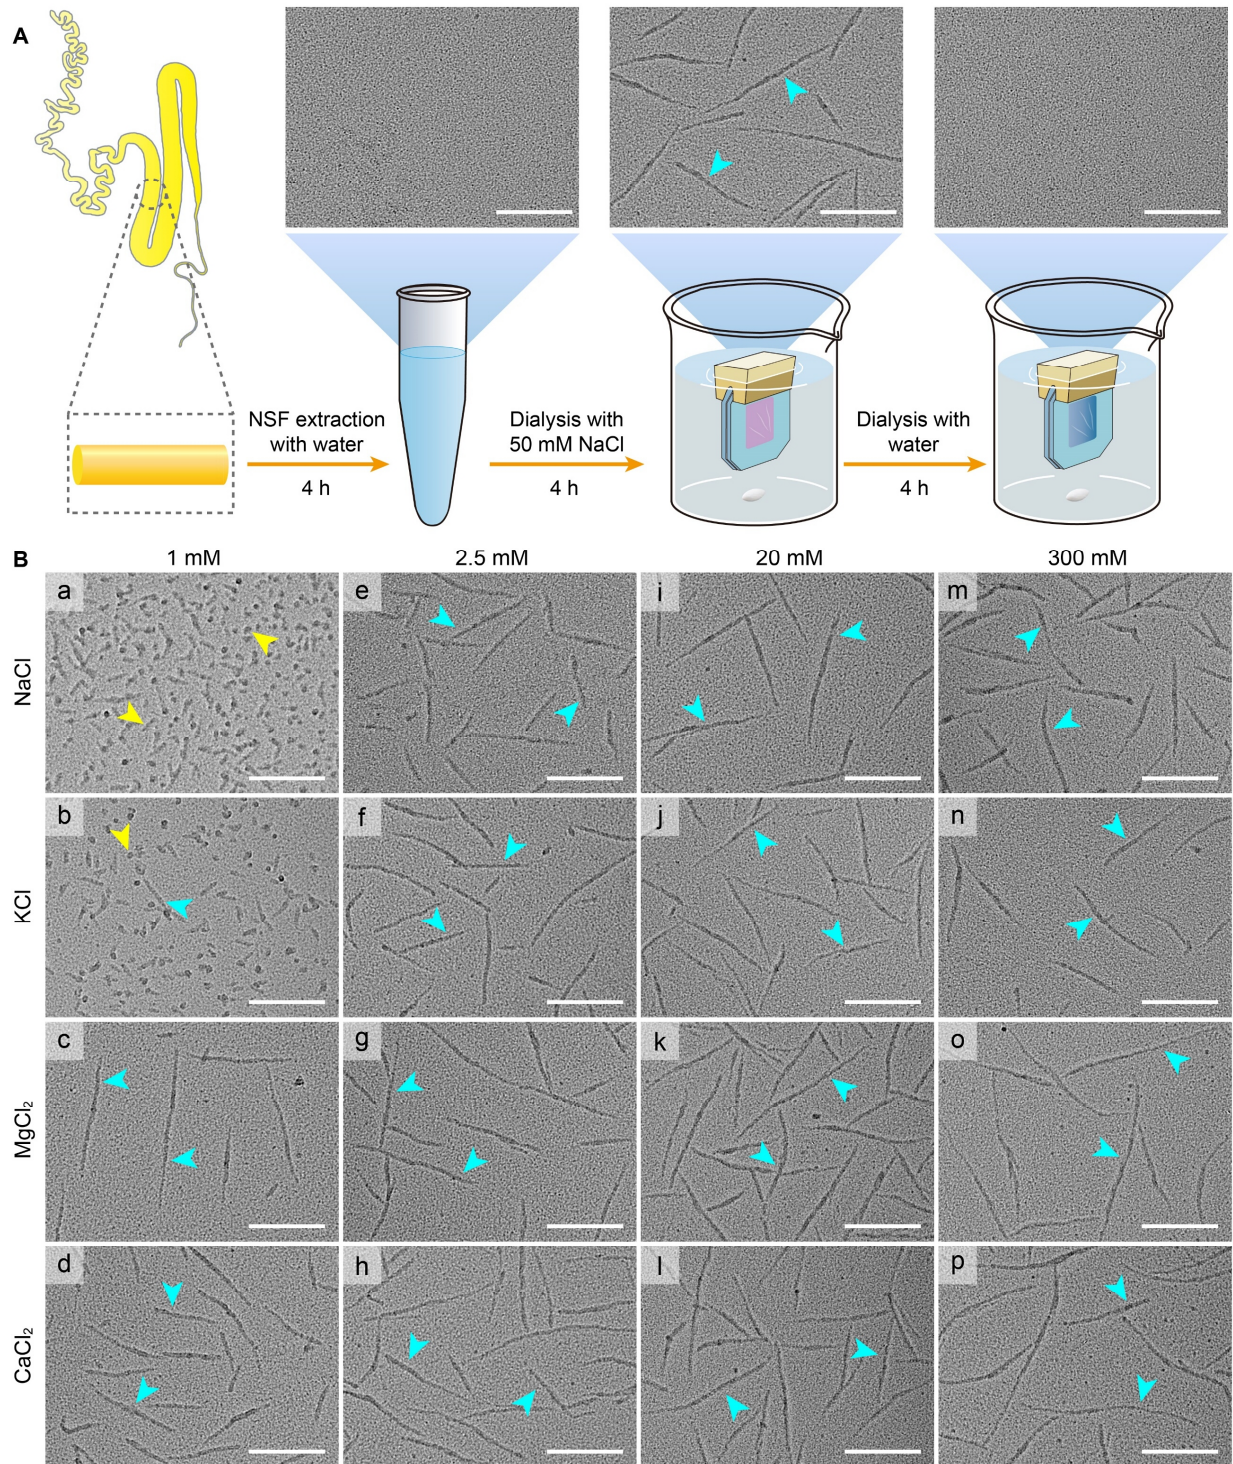

385

386 **Fig. 3. Effect of metal ions on the formation of NSF nanofibrils.** (A) Metal ions induced the  
387 formation of NSF nanofibrils. (B) Metal shadowing of NSF in the presence of different  
388 concentrations of metal ions. Blue and yellow arrows showed the mature NSF nanofibrils and the  
389 immature fibrous-like structure, respectively. Scale bar, 200 nm.

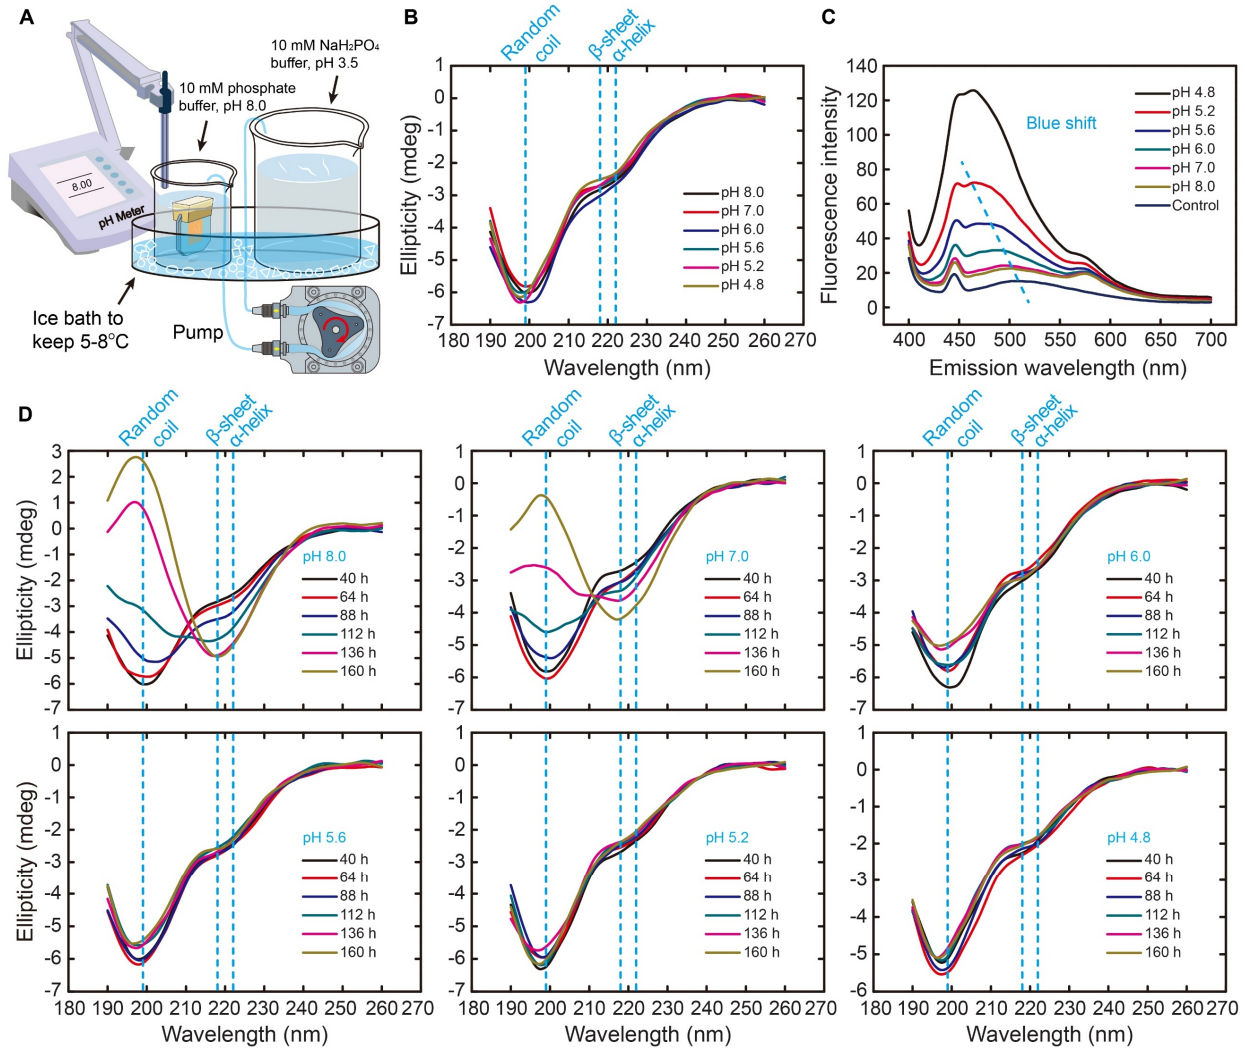

390

391 **Fig. 4. Effect of pH on the structure of NSF.** (A) Schematic diagram of the formation of a  
392 continuous decreasing pH gradient. (B) CD spectra of NSF under different pH. (C) ANS  
393 fluorescence spectra of NSF under different pH. The dotted line showed the blue shift of λ<sub>max</sub> of  
394 NSF. (D) Effect of pH on CD spectra of NSF over time.

395

396

397

398

399

400

401

402

403

404

405

406

407

408

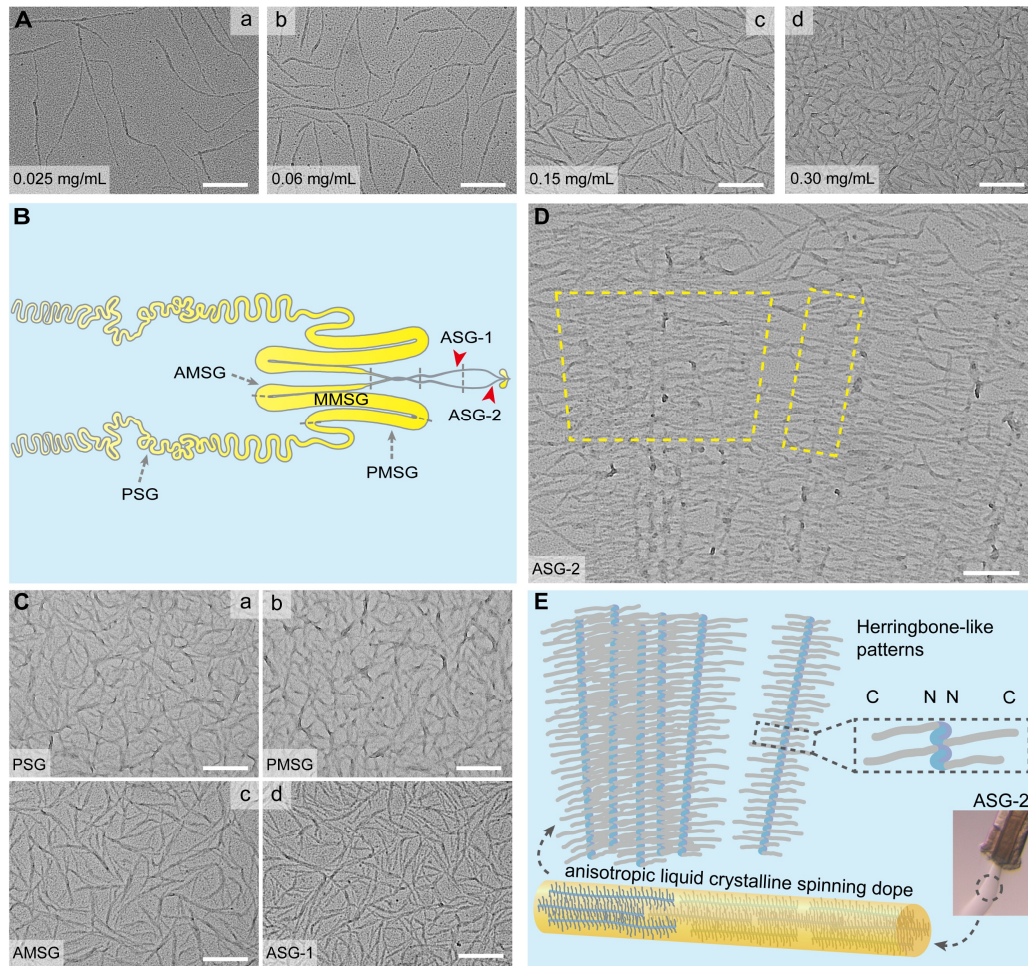

409

410 **Fig. 5. Metal shadowing showed the arrangement and orientation of NSF nanofibrils. (A)**  
411 **Metal shadowing of different concentrations of NSF in solution. (B) Schematic diagram of**  
412 **different divisions of the silk gland. (C) Metal shadowing of NSF *in situ* from different divisions**  
413 **of the silk gland. (D) Herringbone-like patterns (anisotropic liquid crystalline phase) self-**  
414 **assembled by NSF nanofibrils at ASG-2. The yellow boxes indicate representative herringbone-**  
415 **like patterns. (E) Schematic diagram of anisotropic liquid crystalline spinning dope self-**  
416 **assembled by NSF nanofibrils. C and N, the C and N terminal domain of Fib-H, respectively.**  
417 **Scale bar, 200 nm.**

418

419

420

421

422

423

424

425

426

427

428

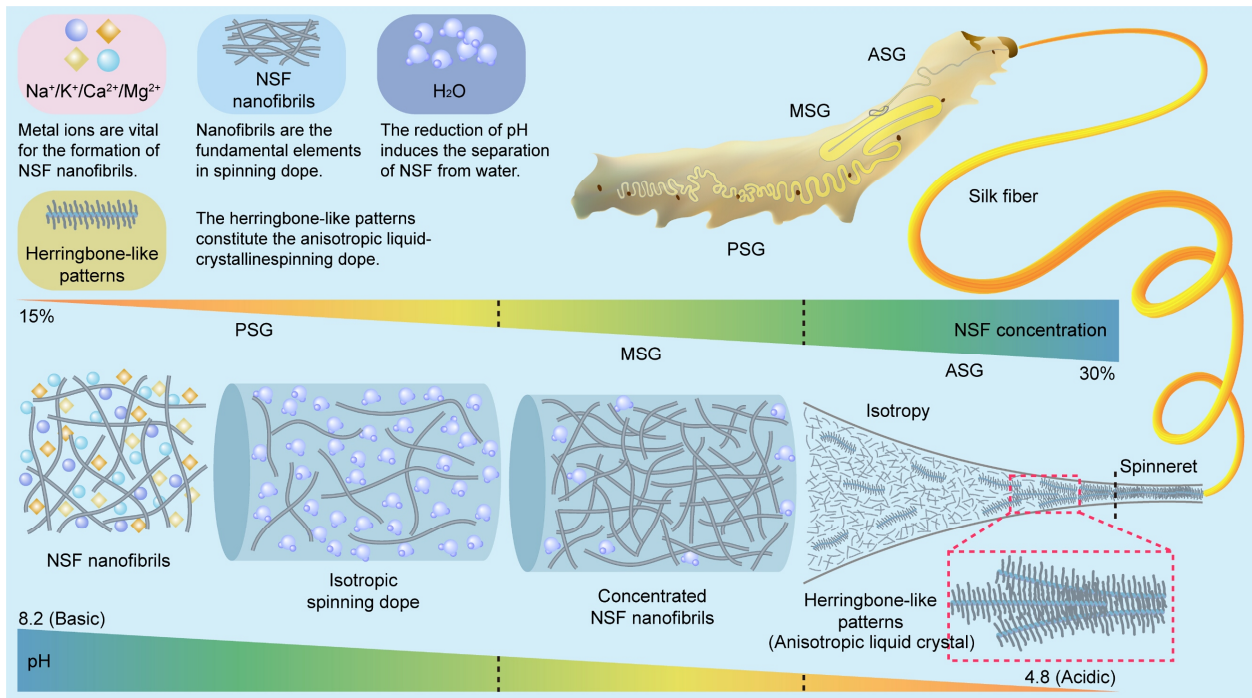

429

430 **Fig. 6. Schematic illustration of the programmed self-assembly of NSF driven by pH**  
 431 **gradient and metal ions in the silk gland of the silkworm. (a)** NSF is a soluble  
 432 macromolecular complex with a sedimentation coefficient of 5.8 S, and present as nanofibrils  
 433 induced by metal ions in the silk gland. **(b)** From PSG to ASG, NSF is mainly composed of  
 434 random coils. With the decrease of pH from about 8.2 in PSG to 4.8 in ASG, the hydrophobicity  
 435 of NSF is gradually enhanced, and NSF concentration increases up to about 30% (w/v). **(c)** Near  
 436 the spinneret at ASG-2, NSF nanofibrils self-assemble into herringbone-like patterns (anisotropic  
 437 liquid-crystalline phase) ready for silkworm spinning.

438

439

440

441

442

443

444

445

446

447

448

449

450

451

452

453

454

455

456

## 457 **Methods**

### 458 **Isolation and purification of NSF**

459 The silkworm strain Jinsong (*Bombyx mori*), used in this study, was supplied by the State Key  
460 Laboratory of Silkworm Genome Biology (Southwest University, Chongqing, China). Silkworm  
461 larvae were reared at room temperature until the early wandering stage, then frozen with liquid  
462 nitrogen and stored at -80°C. The silk gland is divided into posterior silk gland (PSG), middle  
463 silk gland (MSG) and anterior silk gland (ASG) (51). Further, MSG has three sections including  
464 posterior of MSG (PMSG), middle of MSG (MMSG) and anterior of MSG (AMSG) (52). Silk  
465 gland was dissected from the frozen silkworm. Silk protein is composed of fibroin and sericin,  
466 and stored in the lumen of silk gland (LSG) after synthesis. Sericin could be easily separated  
467 from fibroin as it becomes insoluble after freezing. Therefore, natural silk fibroin (NSF) could be  
468 purified from the lumen of PSG, PMSG, MMSG and AMSG, respectively. Ultrapure water was  
469 prepared by Milli-Q IQ 7000 (Merck, Germany) and used for all tests.

470 ASG was collected from two hundred fifty living silkworm larvae at the late wandering stage,  
471 and then rinsed twice with phosphate-buffered saline (PBS, pH 7.4) for 5 s each. Next, ASG was  
472 submerged into 4 mL buffer I (100 mM NaCl, 20 mM Tris-HCl, 0.5 mM EDTA, pH 7.3) pre-  
473 cooled at 4°C, and carefully sliced into 3-5 mm segments. After incubation on ice for 4 h, NSF  
474 was gradually extracted into buffer I. To keep NSF stable, digitonin was added into the  
475 supernatant (0.1%, w/v) after centrifugation at 10,000 g at 4°C for 10 min. Then, the supernatant  
476 was incubated with S cation exchange media (200 µL) (Bio-rad, USA) with rotation at 4°C for 2  
477 h. After centrifugation at 1,000 g at 4°C for 10 min, the supernatant was then incubated with Q  
478 anion exchange media (200 µL) (Bio-rad) at 4°C for 2 h. Then the media was removed by  
479 centrifugation at 10,000 g at 4°C for 10 min. S and Q media were pre-equilibrated with buffer I,  
480 respectively. NSF was further purified from the supernatant by size-exclusion chromatography  
481 on a Superdex 200 10/300 GL increase column (GE Healthcare, USA) with 10 mM phosphate  
482 buffer (Na<sub>2</sub>HPO<sub>4</sub>, NaH<sub>2</sub>PO<sub>4</sub>, pH 8.0) containing 0.015% digitonin. The homogeneity of NSF was  
483 assessed by sodium dodecyl sulfate polyacrylamide gel electrophoresis (SDS-PAGE) and  
484 Coomassie Brilliant Blue staining (Extended Data Fig. 2). NSF concentration was measured at  
485 280 nm on a NanoDrop 2000C spectrophotometer (Thermo Fisher Scientific, USA). NSF was  
486 freshly purified and used immediately to avoid the potential effect of flash-frozen with liquid  
487 nitrogen on the structure and properties of NSF.

488

### 489 **Preparation of regenerated silk fibroin**

490 Regenerated silk fibroin (RSF) was prepared as previously described (33) with minor  
491 modifications. Silkworm cocoons were boiled in 0.02 M Na<sub>2</sub>CO<sub>3</sub> for 30 min, and then rinsed  
492 with water twice to remove soluble sericin from silk fibroin. After drying overnight at room  
493 temperature, the degummed silk fiber (silk fibroin) was dissolved in 9 M LiBr (Sangon, China)  
494 at 60°C for 20 min to yield 10% (w/v) RSF solution. RSF was dialyzed against water at 4°C for  
495 12 h to remove LiBr, and then dialyzed against 10 mM PBS (pH 8.0) at 4°C for 12 h. After  
496 removal of the undissolved aggregates by centrifugation (10,000 g) at 4°C for 15 min, RSF  
497 concentration was determined at 280 nm on a NanoDrop 2000C spectrophotometer (Thermo  
498 Fisher Scientific).

499

### 500 **Expression and purification of MSP1D1**

501 Membrane scaffold protein MSP1D1 was expressed and purified as described (53) with minor  
502 modifications. In brief, MSP1D1 was expressed in *E. coli* BL21 (DE3) and induced with 1 mM  
503 isopropyl  $\beta$ -D-1-thiogalactopyranoside (IPTG) until the OD<sub>600</sub> of the cells reached 0.6 at 37°C.  
504 After 4 h of induction at 28°C, the cells were collected and then lysed in 20 mM PBS (pH 7.4)  
505 containing 1 mM PMSF and 1% Triton X-100. MSP1D1 was purified using his-tag affinity  
506 chromatography after centrifugation at 12,000 g for 30 min at 4°C, and then dialyzed against 20  
507 mM PBS (pH 7.4) at 4°C for 24 h to remove imidazole. MSP1D1 concentration was measured at  
508 280 nm using a calculated extinction coefficient of 21,430 L·mol<sup>-1</sup>·cm<sup>-1</sup>. MSP1D1 was  
509 concentrated to 5 mg·mL<sup>-1</sup> and stored at -80°C.

510

### 511 **Polyacrylamide gel electrophoresis**

512 NSF was boiled in reducing buffer for 10 min, and then analyzed by a linear gradient (4-16%)  
513 SDS-PAGE gel, which was generated by Hoefer SG 30 gradient maker (Thermo Fisher  
514 Scientific). The linear gradient (3-16%) blue native-PAGE (BN-PAGE) gel was cast as witting's  
515 protocol (54) using Hoefer SG 30 gradient maker. NSF was incubated with amphipol (Anatrace,  
516 USA) at a mass ratio of 1:6 at 4°C for 72 h, then mixed with native-PAGE loading buffer  
517 (Invitrogen, USA) and separated by 3-16% BN-PAGE. The molecular weight of NSF was  
518 estimated as 445 kDa.

519

### 520 **Circular dichroism**

521 Circular dichroism (CD) spectra were collected from 260 to 190 nm using a 0.1 cm light-path  
522 quartz cuvette on a Chirascan Plus spectrometer (Chirascan, UK) with 1 nm bandwidth, 0.5 s  
523 response time and 50 nm·min<sup>-1</sup> scanning speed. NSF was dissolved in 10 mM PBS (pH 8.0) with  
524 a final concentration of 0.1 mg·mL<sup>-1</sup>.

525

### 526 **Sedimentation velocity analytical ultracentrifugation**

527 NSF was mixed with amphipol at a mass ratio of 1:6 in buffer II (50 mM NaCl, 50 mM Bis-  
528 Tris, 0.5 mM EDTA, pH 7.5) with a final concentration of 0.75 mg·mL<sup>-1</sup>. Amphipol was  
529 dissolved in buffer II with the same concentration as the control. After 72 h of incubation at 4°C,  
530 NSF/amphipol (400  $\mu$ L) and amphipol (400  $\mu$ L) were loaded into double-sector quartz cells,  
531 respectively, mounted into an eight-hole AN-50 Ti rotor, and then centrifuged at 45,000 rpm on  
532 ProteomeLab XL-I (Beckman coulter, USA) at 20°C for 5 h. The absorbance at 280 nm was  
533 recorded for sedimentation velocity analytical ultracentrifugation (SV-AUC) analysis. The buffer  
534 density, viscosity and partial specific volume of NSF were calculated using SEDNTERP (ver.  
535 1.09) to be 1.0018 g·mL<sup>-1</sup>, 1.02298 cP and 0.6945 cm<sup>3</sup>·g<sup>-1</sup>, respectively.

536

### 537 **Metal shadowing**

538 Metal shadowing was performed as Griffith's method (55), as illustrated in figure. S8. For the  
539 metal shadowing of NSF in solution, one droplet of NSF (5  $\mu$ L, 0.025 mg·mL<sup>-1</sup>) was applied to  
540 glow-discharged copper grids for 2 min. Excess NSF was carefully removed by blotting paper.  
541 For the metal shadowing of NSF *in situ* in the spinning dope, a glow-discharged copper grid was  
542 placed on the spinning dope to touch it gently and carefully with tweezers without moving the  
543 copper grip to avoid the possible artifact of NSF stacking. NSF was dehydrated in gradient  
544 ethanol (0, 25%, 50%, 75%, 100%) for 4 min each, then shadowed with tungsten by DV-502B  
545 high vacuum evaporator (Denton Vacuum, USA) followed by air drying. A tungsten wire (8 cm



546 in length) was clamped between two electrodes at a distance of 3.8 cm. The distance of the wire  
547 was 9.3 cm from the center of the specimen platform. The angle between the tungsten wire and  
548 the sample was about 10°. The total evaporation time was 14.5 min. NSF was kept rotation  
549 during the evaporation. Transmission electron microscopy (TEM) was carried out on a Tecnai  
550 Spirit (FEI, USA).  
551

### 552 **Cryogenic transmission electron microscopy**

553 NSF was purified from PMSG, and then mixed with amphipol in buffer II at a mass ratio of  
554 1:6. The final concentration of NSF was 1.5 mg·mL<sup>-1</sup>. After 72 h of incubation at 4°C, the  
555 mixture (3 µL) was loaded on a glow-discharged holey grid (GIG, 1.2-1.3, Au), then vitrified by  
556 flash plunging the grid into liquid ethane using vitrobot Mark IV (FEI). The blotting time, force  
557 level and humidity were set to be 7 s, 0 and 100%, respectively. Cryogenic transmission electron  
558 microscopy (Cryo-TEM) was performed on a 200 kV Talos F200C microscope (FEI) equipped  
559 with Ceta camera (FEI).  
560

### 561 **Stability analysis of NSF**

562 NSF was purified from PMSG with 20 mM PBS (pH 7.4), and then gently incubated with  
563 various detergents at 4°C. The final concentration of NSF and the detergents was 2.93 mg·mL<sup>-1</sup>  
564 and five folds of critical micelle concentration (CMC), respectively, except amphipol was mixed  
565 with NSF at a mass ratio of 3:1 (Extended Data Table 1). NSF was incubated with MSP1D1 and  
566 BSA as the same procedures. Here, the concentrations of NSF, MSP1D1 and BSA were 2  
567 mg·mL<sup>-1</sup>, 4 mg·mL<sup>-1</sup> and 10.56 mg·mL<sup>-1</sup> (Extended Data Table 2 and 3), respectively. Then, the  
568 mixture (8 µL) was collected every 24 h, and centrifuged at 10,000 g at 4°C for 10 min. The  
569 concentration of the supernatant was determined at 280 nm on a NanoDrop 2000C  
570 spectrophotometer (Thermo Fisher Scientific) to value the effects of the detergents, MSP1D1  
571 and BSA on the stability of NSF. Various detergents and BSA were dissolved in water and 20  
572 mM PBS (pH 7.4), respectively, and stored at -20°C.  
573

### 574 **Liquid chromatography-tandem mass spectrometry**

575 To identify the components of NSF, NSF was separated by a linear 4-16% SDS-PAGE, and  
576 then stained with Coomassie light blue. The target bands were excised for alkylation and  
577 reduction with dithiothreitol and iodoacetamide (Sigma, USA), respectively, then digested  
578 overnight with trypsin (Promega, USA). Next, the in-gel proteins were extracted by successive  
579 washing of gel slices with acetonitrile, and then subjected to liquid chromatography-tandem  
580 mass spectrometry (LC-MS/MS) using an LTQ Orbitrap XL mass spectrometer (Thermo Fisher  
581 Scientific) coupled to a RSLC nano-high performance liquid chromatography (Dionex, USA)  
582 system. The peptides were loaded onto a self-packing column (inner diameter, 75 µm; length, 15  
583 cm) filled with 3 µm ReproSil-Pur C18-AQ resin (Dr. Maisch GmbH, Germany), and then eluted  
584 with an organic gradient phase (buffer A: 0.5% formic acid/H<sub>2</sub>O; buffer B: 0.5% formic  
585 acid/acetonitrile) at a flow rate of 300 nL/min for 100 min. The program was set as: 0-77 min, 4%  
586 buffer B; 78-82 min, 36% buffer B; 83-90 min, 80% buffer B; 91-100 min, 4% buffer B. The  
587 datasets were processed with the Proteome Discoverer program (ver 1.4.0.288, Thermo Fischer  
588 Scientific). In general, a mass tolerance of 20 ppm for parent ions, 0.6 Da for fragment ions, two  
589 missed cleavages, oxidation of Met (dynamic modification) and carbamidomethyl cysteine (fixed

590 modification) were selected as search matching parameters. The results were evaluated using a  
591 percolator node (high-confidence q value, FDR < 0.01) to exclude false positives.  
592

### 593 **ANS fluorescence spectroscopy**

594 ANS fluorescence spectra were collected on an F7000 spectrophotometer (Hitachi, Japan) in  
595 dark at room temperature using a 1 cm light-path cell. NSF (0.3 nM) was incubated with 3 nM  
596 ANS in dark under different pH on ice for 3 h. Then, the samples were excited at 388 nm, and  
597 the fluorescence emission spectra were recorded from 400 to 700 nm with a scanning speed of  
598 240 nm·min<sup>-1</sup>. ANS was dissolved in water with a stock concentration of 3 mM.  
599

### 600 **Ultrathin section of ASG**

601 ASG (including the spinneret) was carefully dissected from mature fifth instar silkworm larvae  
602 to ensure that NSF did not leak from the lumen of the silk gland, rinsed twice with 20 mM PBS  
603 (pH 7.4) for 3 s each time, and then fixed in 2.5% (v/v) glutaraldehyde/phosphate buffer (0.1 M,  
604 pH 7.4) (PB). Next, ASG was fixed with 1% osmium tetroxide (OsO<sub>4</sub>) in PB buffer at 4°C for 2  
605 h after rinsed three times with PB buffer, and then dehydrated by gradient ethanol (30%, 50%,  
606 70%, 80%, 90%, 100%, 100%, 7 min each) and acetone twice (10 min each). Subsequently, ASG  
607 was sequentially immersed into a graded mixture of acetone and SPI-PON812 resin (19.6 mL  
608 SPI-PON812, 6.6 mL DDSA, and 13.8 mL NMA) as the ratio of 3:1, 1:1, 1:3 (v/v), and then  
609 infiltrated into the pure resin. Finally, ASG was embedded into the resin with 1.5% BDMA, and  
610 then polymerized at 45°C for 12 h and at 60°C for 48 h, respectively. ASG was sliced into ultra-  
611 thin sections (70 nm thick) by the ultramicrotome EM UC6 (Leica, Germany) using a diamond  
612 knife, double stained with uranyl acetate and lead citrate, and then imaged on a Tecnai Spirit  
613 transmission electron microscope (FEI).  
614

### 615 **Dynamic light scattering**

616 NSF was freshly purified from PMSG with buffer II, and then centrifuged at 10,000 g for 10  
617 min at 4°C to remove the aggregates. The concentration of NSF was 0.5 mg·mL<sup>-1</sup>. Dynamic light  
618 scattering (DLS) was performed on NanoStar (WAYTT, USA) to determine the size distribution  
619 of NSF before and after dialysis with water. The hydrodynamic radius and the polydispersity  
620 coefficient were analyzed using Dynamics (ver 7.1.8.93, USA) and presented as the average  
621 from ten independent tests (mean ± SD).  
622

### 623 **Data availability**

624 All data are available in the main text or the Extended Data.  
625

- 626 51. Q. Xia, S. Li, Q. Feng, Advances in silkworm studies accelerated by the genome sequencing of *Bombyx mori*.  
627 *Annu. Rev. Entomol.* **59**, 513-536 (2014).
- 628 52. J. Y. Li *et al.*, Comparative proteomic analysis of the silkworm middle silk gland reveals the importance of  
629 ribosome biogenesis in silk protein production. *J. Proteomics* **126**, 109-120 (2015).
- 630 53. T. K. Ritchie *et al.*, Chapter 11 - Reconstitution of membrane proteins in phospholipid bilayer nanodiscs.  
631 *Methods Enzymol.* **464**, 211-231 (2009).
- 632 54. I. Wittig, H. P. Braun, H. Schagger, Blue native PAGE. *Nat. Protoc.* **1**, 418-428 (2006).
- 633 55. J. D. Griffith, Electron microscopic visualization of DNA in association with cellular components. *Methods Cell*  
634 *Biol.* **7**, 129-146 (1973).  
635

636 **Acknowledgments:** We thank Youwang Wang, Wanyu Wu for assistance with the isolation of  
637 silk gland, Xiaoxia Yu and Jianhui Li for technical assistance on AUC, DLS and CD spectra,  
638 Fuquan Yang, Xing Ding for support with mass spectrometry, Yang Cao for critical reading and  
639 helpful discussion. We also thank all members of the center for biological imaging for their  
640 support in EM, and in Zhu lab, He lab and Xia lab for their help.

641  
642 **Author contributions:** K. Song and H. He conceived the experiments. K. Song carried out most  
643 of the experiments, analyzed the data, composed the figures and wrote the draft. Y. Wang  
644 analyzed the data, revised the manuscript and figures. W. Dong performed the ultrathin section.  
645 Z. Li analyzed the data. H. He, P. Zhu, and Q. Xia supervised the project, analyzed the data and  
646 revised the manuscript and figures.

647  
648 **Funding:** This work was supported by the State Key Program of National Natural Science of  
649 China (31530071, 31730023), the National Natural Science of China (31972622), Natural  
650 Science Foundation of Chongqing, China (cstc2020jcyj-cxttX0001), the Fundamental Research  
651 Funds for the Central Universities (XDJK2020TJ001, XDJK2020C049), and the Chinese  
652 Academy of Sciences (CAS) Strategic Priority Research Program (XDB37010100).

653  
654 **Competing interests:** The authors declare no competing interests.

655  
656  
657  
658  
659  
660  
661  
662  
663  
664  
665  
666  
667  
668  
669  
670  
671  
672  
673  
674  
675  
676



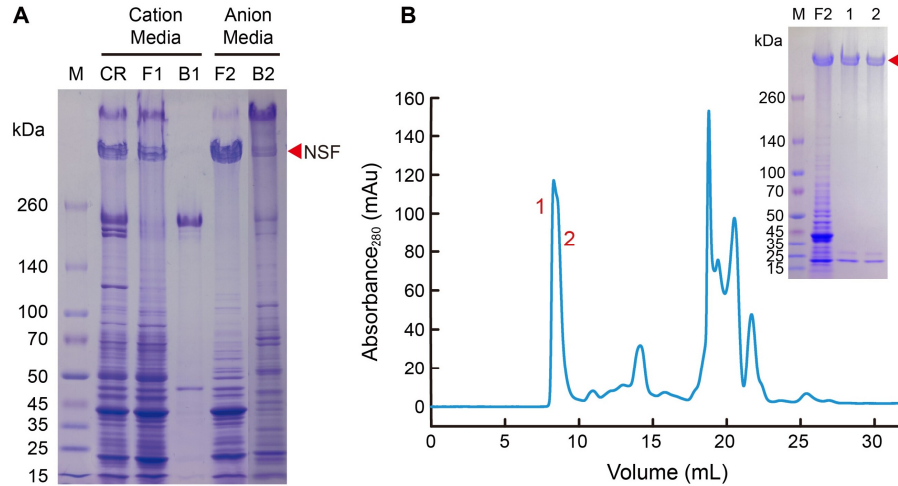

684

685 **Extended Data Fig. 2. Purification of NSF from ASG. (A)** A linear 4-16% gradient SDS-  
686 PAGE analysis of NSF purified by ions exchange chromatography. M, marker; CR, the crude  
687 extraction of ASG; F1, flow-through fraction of the S cation exchange media; B1, beads (S); F2,  
688 flow-through fraction of the Q anion exchange media; B2, beads (Q). **(B)** Purification of NSF by  
689 size-exclusion chromatography. The inset showed the purity of NSF valued by 4-16% SDS-  
690 PAGE. Fractions 1 and 2 were pooled for CD spectra and metal shadowing.

691

692

693

694

695

696

697

698

699

700

701

702

703

704

705

706

707

708

709

710

711

712

713

714

715

716

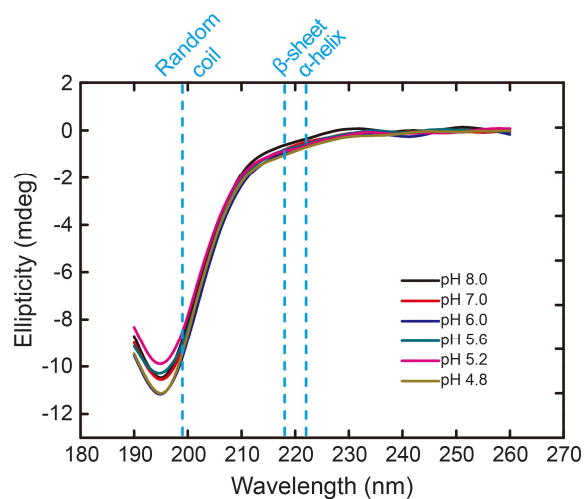

717

718 **Extended Data Fig. 3. CD spectra of RSF under different pH.** The concentration of RSF was  
719  $0.1 \text{ mg} \cdot \text{mL}^{-1}$ .

720

721

722

723

724

725

726

727

728

729

730

731

732

733

734

735

736

737

738

739

740

741

742

743

744

745

746

747

748

749

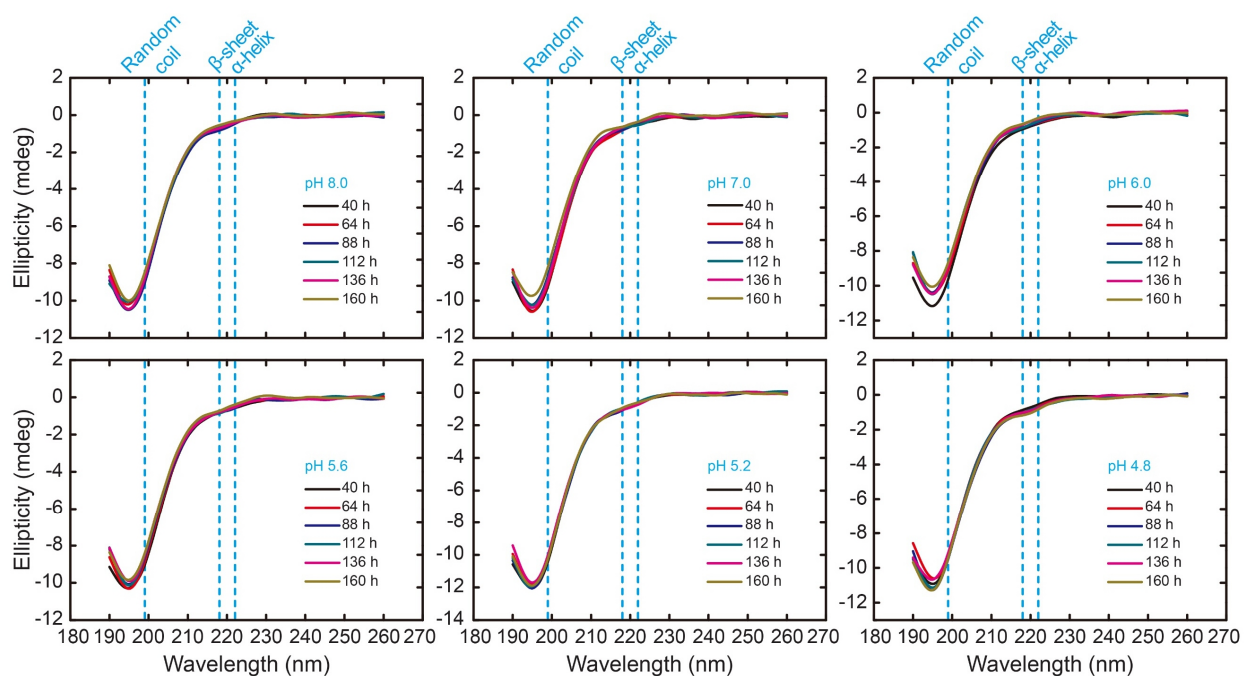

750  
751 **Extended Data Fig. 4. CD spectra of RSF under different pH.** The concentration of RSF was  
752  $0.1 \text{ mg} \cdot \text{mL}^{-1}$ .  
753  
754  
755  
756  
757  
758  
759  
760  
761  
762  
763  
764  
765  
766  
767  
768  
769  
770  
771  
772  
773  
774  
775  
776  
777  
778

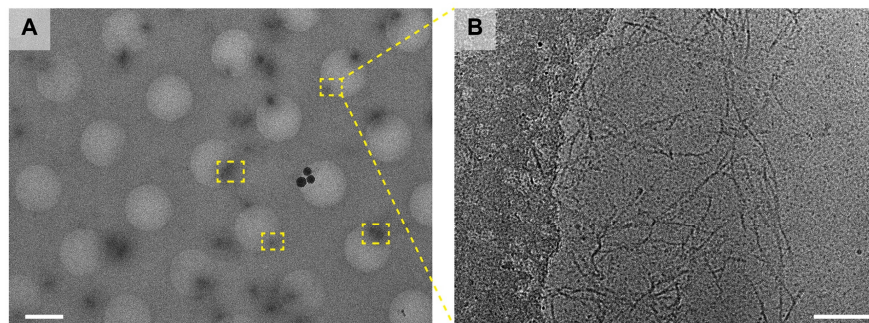

779

780 **Extended Data Fig. 5. Cryo-TEM of NSF from PMSG. (A)** Low-magnification image of NSF  
781 nanofibrils. Scale bar, 2  $\mu\text{m}$ . **(B)** High-magnification image of NSF nanofibrils. Scale bar, 100  
782 nm.

783

784

785

786

787

788

789

790

791

792

793

794

795

796

797

798

799

800

801

802

803

804

805

806

807

808

809

810

811

812

813

814

815



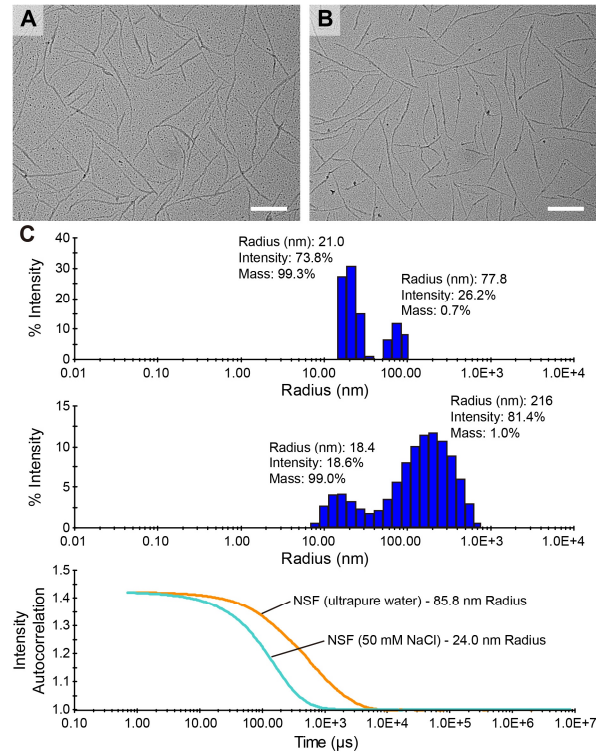

816

817 **Extended Data Fig. 6. Metal shadowing of NSF.** (A) Metal shadowing of NSF from PMSG.  
818 Scale bar, 200 nm. (B) Metal shadowing of NSF from PMSG after 18 h of incubation with 8 M  
819 urea, 2% Triton X-100, 15 mM DTT at 25°C. NSF was dissolved in buffer II with a final  
820 concentration of 0.025 mg·mL<sup>-1</sup>. Scale bar, 200 nm. (C) DLS analysis of the hydrodynamic size  
821 distribution of NSF in buffer II (up), after dialysis against water (middle) and the correlation  
822 curves (down).

823

824

825

826

827

828

829

830

831

832

833

834

835

836

837

838

839

840

841

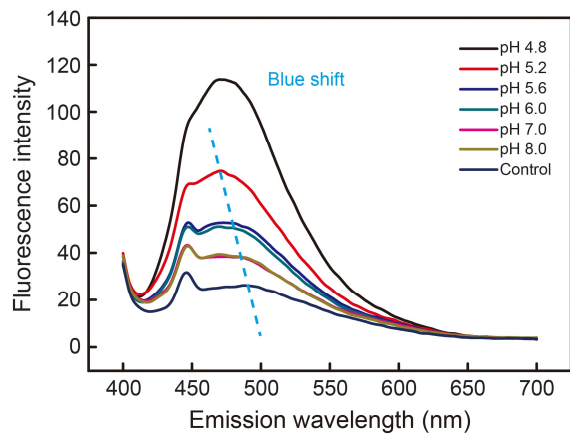

842  
843 **Extended Data Fig. 7. ANS fluorescence spectra of RSF under different pH.** The dotted line  
844 showed the blue shift of  $\lambda_{max}$ . The concentration of RSF was  $0.2 \text{ mg} \cdot \text{mL}^{-1}$ .  
845

846  
847  
848  
849  
850  
851  
852  
853  
854  
855  
856  
857  
858  
859  
860  
861  
862  
863  
864  
865  
866  
867  
868  
869  
870  
871  
872  
873  
874  
875  
876

877

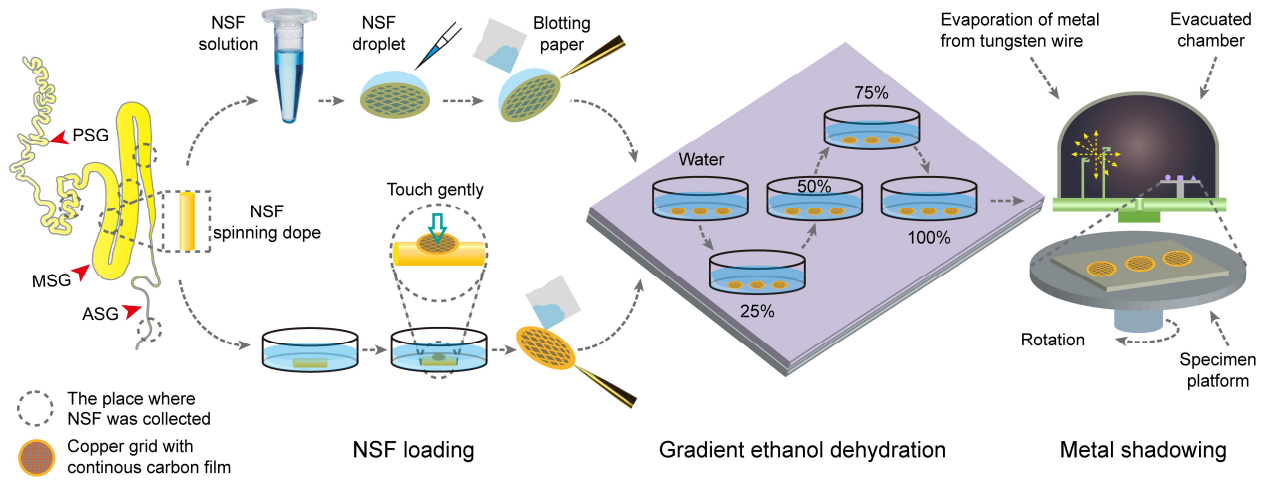

878

879 **Extended Data Fig. 8. Schematic diagram of the metal shadowing of NSF in water and *in***  
880 ***situ* in the spinning dope from the silk gland.**

881

882

883

884

885

886

887

888

889

890

891

892

893

894

895

896

897

898

899

900

901

902

903

904

905

906

907

908

909

910

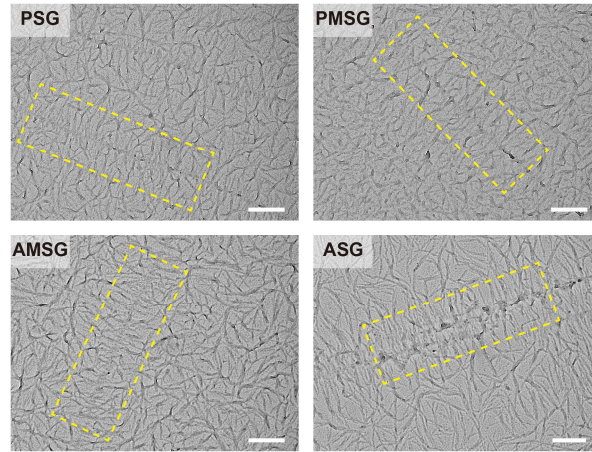

911

912 **Extended Data Fig. 9. Metal shadowing of NSF *in situ* in the silk gland.** Dotted box  
913 represented a herringbone-like pattern of NSF nanofibrils. **PSG**, posterior silk gland. **PMSG**,  
914 **AMSG**, the posterior and anterior of middle silk gland, respectively. **ASG**, anterior silk gland.  
915 Scale bar, 200 nm.

916

917

918

919

920

921

922

923

924

925

926

927

928

929

930

931

932

933

934

935

936

937

938

939

940

941

942

943

944

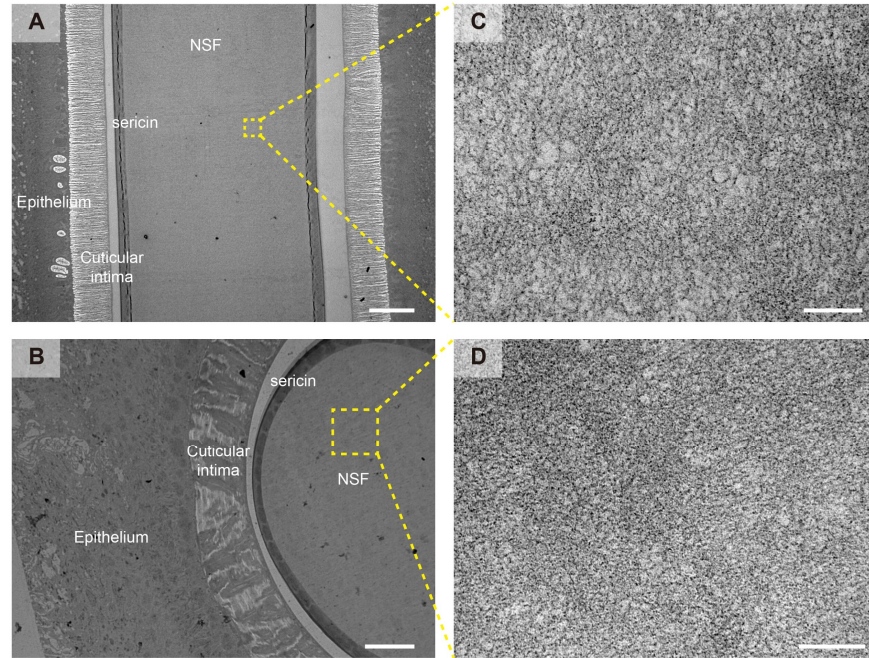

945

946 **Extended Data Fig. 10. Ultrathin-section TEM of ASG-1.** (A) Longitudinal section (parallel  
947 to the spinning direction) of ASG-1. Scale bar, 50  $\mu\text{m}$ . (B) Cross-section (perpendicular to the  
948 spinning direction) of ASG-1. Scale bar, 10  $\mu\text{m}$ . (C-D) The boxes indicated the location of the  
949 magnification, revealing the presence of isotropic NSF spinning dope in the lumen of the silk  
950 gland. Scale bar, 200 nm.

951

952

953

954

955

956

957

958

959

960

961

962

963

964

965

966

967

968

969

970

971

972

973 **Extended Data Table 1. Effect of various detergents on NSF stability**

| Name                                | Detergent ( $\mu\text{L}$ ) | NSF ( $\mu\text{L}$ ) | H <sub>2</sub> O ( $\mu\text{L}$ ) |
|-------------------------------------|-----------------------------|-----------------------|------------------------------------|
| CHAPS (10%)                         | 37.5                        | 110.0                 | 2.5                                |
| DDM (1%)                            | 6.5                         | 110.0                 | 33.5                               |
| DM (100 mM)                         | 13.5                        | 110.0                 | 26.5                               |
| OG (20%)                            | 19.9                        | 110.0                 | 20.1                               |
| Amphipol (100 mg·mL <sup>-1</sup> ) | 13.2                        | 110.0                 | 26.8                               |
| 5-cyclo (15%)                       | 6.0                         | 110.0                 | 34.0                               |
| Digitonin (10%)                     | 4.5                         | 110.0                 | 35.5                               |
| SLS (20%)                           | 3.0                         | 110.0                 | 37.0                               |
| Tween-20 (3%)                       | 10.0                        | 110.0                 | 30.0                               |
| Control                             | 0.0                         | 110.0                 | 40.0                               |

974  
975  
976  
977  
978  
979  
980  
981  
982  
983  
984  
985  
986  
987  
988  
989  
990  
991  
992  
993  
994  
995  
996  
997  
998  
999  
1000  
1001  
1002

1003 **Extended Data Table 2. Effect of MSP1D1 on NSF stability**

| <b>NSF:MSP1D1<br/>(Molar ratio)</b> | <b>NSF<br/>(<math>\mu</math>L)</b> | <b>MSP1D1<br/>(<math>\mu</math>L)</b> | <b>PBS<br/>(<math>\mu</math>L)</b> |
|-------------------------------------|------------------------------------|---------------------------------------|------------------------------------|
| Control (1 : 0)                     | 200.0                              | 0.0                                   | 22.5                               |
| 1 : 1                               | 200.0                              | 5.6                                   | 16.9                               |
| 1 : 2                               | 200.0                              | 11.2                                  | 11.2                               |
| 1 : 3                               | 200.0                              | 16.9                                  | 5.6                                |
| 1 : 4                               | 200.0                              | 22.5                                  | 0.0                                |
| 0 : 1                               | 0.0                                | 5.6                                   | 216.9                              |
| 0 : 2                               | 0.0                                | 11.2                                  | 211.3                              |
| 0 : 3                               | 0.0                                | 16.9                                  | 205.6                              |
| 0 : 4                               | 0.0                                | 22.5                                  | 200.0                              |

1004  
1005  
1006  
1007  
1008  
1009  
1010  
1011  
1012  
1013  
1014  
1015  
1016  
1017  
1018  
1019  
1020  
1021  
1022  
1023  
1024  
1025  
1026  
1027  
1028  
1029  
1030  
1031  
1032  
1033

1034 **Extended Data Table 3. Effect of BSA on NSF stability**

| <b>NSF:BSA<br/>(Molar ratio)</b> | <b>NSF<br/>(<math>\mu</math>L)</b> | <b>BSA<br/>(<math>\mu</math>L)</b> | <b>PBS<br/>(<math>\mu</math>L)</b> |
|----------------------------------|------------------------------------|------------------------------------|------------------------------------|
| Control (1 : 0)                  | 200.0                              | 0.0                                | 22.5                               |
| 1 : 1                            | 200.0                              | 5.6                                | 16.9                               |
| 1 : 2                            | 200.0                              | 11.2                               | 11.2                               |
| 1 : 3                            | 200.0                              | 16.9                               | 5.6                                |
| 1 : 4                            | 200.0                              | 22.5                               | 0.0                                |
| 0 : 1                            | 0.0                                | 5.6                                | 216.9                              |
| 0 : 2                            | 0.0                                | 11.2                               | 211.3                              |
| 0 : 3                            | 0.0                                | 16.9                               | 205.6                              |
| 0 : 4                            | 0.0                                | 22.5                               | 200.0                              |

1035
